# Supplementary material for: Synthesis, characterization, and application of a zinc oxide–pyrrole–thiophene nanocomposite as an efficient adsorbent for the removal of tetracycline
Source: Royal Society of Chemistry journal article supplement (doi:10.1039/d3nj02540c), 2023-01-01
Supplement: d3nj02540c1.pdf [file d3nj02540c1.pdf]

## Electronic Supplementary Information

### Synthesis, Characterization, and Application of a Zinc Oxide-Pyrrole-Thiophene Nanocomposite as an Efficient Adsorbent for Removal of Tetracycline

Jahangir Ahmad War <sup>a</sup> and Hamida-Tun-Nisa Chisti <sup>a\*</sup>

<sup>a</sup> Department of Chemistry, National Institute of Technology, Srinagar-190006

\*Corresponding author; E-mail: [hamida@nitsri.ac.in](mailto:hamida@nitsri.ac.in)

**Scheme ESI-1:** Equations used during the study of adsorption of TC on to ZnO-Py-Th nanocomposite.

**Table ESI-1:** Isotherm Data for Adsorption of TC onto the ZnO-Th-Py Nanocomposite.

**Table ESI-2:** Kinetic Parameters for Removal of TC by nanocomposite, ZnO-Py-Th.

**Table ESI-3:** Values of Thermodynamic Parameters of Adsorption of TC onto the Nanocomposite, ZnO-Py-Th

**Figure ESI-1.** Molecular structures of tetracycline showing unique speciation pattern at different pH (pH range of 2 – 12).

**ESI-1. Adsorption Studies:** Influence of dissolved organic matter (DOM) on TC adsorption.

**Scheme ESI-1.** Equations used during the study of adsorption of TC on to ZnO-Py-Th nanocomposite.

$$\% \text{ desorption} = \frac{\text{amount of TC desorbed to desorbing media}}{\text{amount of TC adsorbed on adsorbent}} \times 100 \quad \text{----- (1)} \quad [1]$$

$$\text{Removal \%} = \frac{C_0 - C_e}{C_0} \times 100 \quad \text{----- (2)} \quad [2]$$

$$q_e = \frac{(C_0 - C_e)V}{m} \quad \text{----- (3)} \quad [3]$$

$$q_t = \frac{(C_0 - C_t)V}{m} \quad \text{----- (4)} \quad [4]$$

where  $C_0$  and  $C_e$  are the initial TC concentration ( $\text{mg L}^{-1}$ ) and concentration at equilibrium time respectively.  $q_e$  and  $q_t$  are adsorption capacity at equilibrium and at any time respectively.  $V$  is the volume (L) of the TC solution and  $m$  is the mass (g) of the adsorbent used.

### Adsorption kinetics equations

$$\log(q_e - q_t) = \log q_e - \frac{k_1 t}{2.303} \quad \text{----- (5)} \quad [5]$$

$$\frac{t}{q_t} = \frac{1}{k_2 q_e^2} + \frac{1}{q_e} t \quad \text{----- (6)} \quad [6]$$

$k_1$  ( $\text{min}^{-1}$ ) and  $k_2$  ( $\text{g mg}^{-1} \text{min}^{-1}$ ) are the pseudo-first-order & pseudo-second-order model rate constants, respectively.

## Adsorption isotherm equations

$$\text{Langmuir model; } q_e = \frac{q_m K_L C_e}{(1 + K_L C_e)} \quad \text{----- (7) [7]}$$

$$\text{Freundlich model; } q_e = K_F C_e^{1/n} \quad \text{----- (8) [7]}$$

$$\text{Temkin model; } q_e = B \ln(AC) \quad \text{----- (9) [7]}$$

$$\text{Kahn model; } q_e = \frac{q_m K C_e}{(1 + K C_e)^n} \quad \text{----- (10) [7]}$$

$$\text{Radke-Prausnitz model; } q_e = \frac{q_{mRP} K_{RP} C_e}{(1 + K_{RP} C_e)^n} \quad \text{----- (11) [7]}$$

$$\text{Dubinin-Radushkevich model; } \ln q_e = q_m - \beta \varepsilon^2 \quad \text{----- (12) [8]}$$

- where  $K_L$  ( $L \text{ mg}^{-1}$ ) is the Langmuir constant, which is related to adsorption and maximum adsorption capacity,  $q_m$  ( $\text{mg g}^{-1}$ ) corresponding to complete monolayer coverage.
- $K_F$  ( $\text{mg/g}$ ) ( $L/\text{mg}$ )<sup>1/n</sup> is related to the adsorption capacity of the adsorbent and  $1/n$  is a constant that is related to the adsorption intensity.
- $A$  is the equilibrium constant of binding corresponding to the maximum energy of binding ( $L \text{ mg}^{-1}$ ) and the constant  $B$  is related to the heat of adsorption ( $J \text{ mol}^{-1}$ ).
- $K$  is Kahn isotherm model exponent,  $n$  is Khan isotherm model constant, and  $q_m$  is Khan isotherm maximum adsorption capacity ( $\text{mg g}^{-1}$ ).
- $q_{mRP}$  is Radke-Prausnitz maximum adsorption capacity ( $\text{mg g}^{-1}$ ),  $K_{RP}$  is Radke-Prausnitz equilibrium constant, and mRP is Radke-Prausnitz model exponent.

- $q_e$  ( $mg\ g^{-1}$ ) is the amount of adsorbate adsorbed per unit mass of adsorbent at equilibrium;  $q_m$  ( $mg\ g^{-1}$ ) is the maximum adsorption capacity;  $\beta$  ( $mol^2\ kJ^{-2}$ ) is a constant related to the adsorption energy; and  $\varepsilon$  ( $kJ\ mol^{-1}$ ) is the adsorption potential.

### Thermodynamic equations

$$\ln k_d = \frac{-\Delta H^\circ}{RT} + \frac{\Delta S^\circ}{R} \quad \text{----- (13)} \quad [1]$$

$$\Delta G^\circ = \Delta H^\circ - T\Delta S^\circ \quad \text{----- (14)} \quad [9]$$

where  $\Delta G^\circ$  = standard free energy change of adsorption, R = gas constant (0.008314 kJ mol<sup>-1</sup> K<sup>-1</sup>), T = temperature (K).

**Table ESI-1.** Isotherm Data for Adsorption of TC onto the ZnO-Th-Py Nanocomposite.

| Isotherm model         | Parameters                                                    | TC (Values)       |                         |                         |
|------------------------|---------------------------------------------------------------|-------------------|-------------------------|-------------------------|
|                        |                                                               | 298K              | 308K                    | 318K                    |
| <b>Langmuir</b>        | $q_m$ (mg/g)                                                  | 377.527 ± 0.398   | 404.242 ± 0.330         | 436.555 ± 0.293         |
|                        | $K_L$ (L/mg)                                                  | 0.348 ± 0.003     | 0.373 ± 0.002           | 0.401 ± 0.002           |
|                        | RMSE                                                          | 0.387             | 0.274                   | 0.222                   |
|                        | $R^2$                                                         | 0.999             | 0.999                   | 0.999                   |
| <b>Freundlich</b>      | $K_F$ (mg <sup>1-1/n</sup> L <sup>1/n</sup> g <sup>-1</sup> ) | 229.890 ± 11.334  | 253.13892 ± 11.70918    | 281.076 ± 12.220        |
|                        | 1/n                                                           | 0.112 ± 0.013     | 0.10598 ± 0.01284       | 0.099 ± 0.01208         |
|                        | RMSE                                                          | 85.672            | 88.418                  | 93.147                  |
|                        | $R^2$                                                         | 0.900             | 0.901                   | 0.900                   |
| <b>Temkin</b>          | $A$ (L/g)                                                     | 252.419 ± 216.561 | 423.735 ± 385.986       | 756.492 ± 738.105       |
|                        | $B$ (J/mol)                                                   | 37.801 ± 3.594    | 38.515 ± 3.677          | 39.450 ± 3.803          |
|                        | RMSE                                                          | 58.029            | 60.739                  | 64.975                  |
|                        | $R^2$                                                         | 0.995             | 0.995                   | 0.996                   |
| <b>Radke-Prausniiz</b> | $q_m$                                                         | 391.931 ± 1.927   | 253.373 ± 1211.666      | 281.281 ± 12.601        |
|                        | $K_{RP}$                                                      | 0.316 ± 0.004     | 2.42439E46 ± 1.11305E47 | 1.13239E45 ± 6.53376E44 |
|                        | $n$                                                           | 0.316 ± 0.004     | 0.894 ± 0.381           | 0.900 ± 0.013           |
|                        | RMSE                                                          | 0.046             | 88.423                  | 93.151                  |
|                        | $R^2$                                                         | 1.00              | 0.993                   | 0.994                   |
| <b>Kahn</b>            | $q_m$                                                         | 58.488            | 414.588 ± 1.421         | 389.897 ± 1.731         |
|                        | $n$                                                           | 0.900             | 1.007 ± 0.001           | 1.009 ± 0.001           |
|                        | $R^2$                                                         | 0.994             | 1.00                    | 1.00                    |

**Table ESI-2.** Kinetic Parameters for Removal of TC by nanocomposite, ZnO-Py-Th

| Adsorbent                 |                            | Pseudo-first order     |       |                                               | Pseudo-second-order    |       |
|---------------------------|----------------------------|------------------------|-------|-----------------------------------------------|------------------------|-------|
| ZnO-Py-Th<br>$C_o$ (mg/L) | $k_1$ (min <sup>-1</sup> ) | $q_e$ (cal.)<br>(mg/g) | $R^2$ | $k_2$ (g mg <sup>-1</sup> min <sup>-1</sup> ) | $q_e$ (cal.)<br>(mg/g) | $R^2$ |
| 50 ppm                    | 0.018                      | 158                    | 1.00  | 0.00167                                       | 257.50                 | 0.98  |
| 60 ppm                    | 0.013                      | 199.32                 | 1.00  | 0.0057                                        | 284.90                 | 0.99  |
| 70 ppm                    | 0.009                      | 251.18                 | 1.00  | 0.020                                         | 306.74                 | 0.99  |
| 80 ppm                    | 0.0046                     | 316.22                 | 1.00  | 0.0027                                        | 357.14                 | 0.97  |
| 90 ppm                    | 0.0036                     | 416.82                 | 1.00  | 0.0022                                        | 390.62                 | 0.97  |

**Table ESI-3.** Values of Thermodynamic Parameters of Adsorption of TC onto the Nanocomposite, ZnO-Py-Th

| Conc. |                                          | Thermodynamic Parameters                                 |                                          |         |         |
|-------|------------------------------------------|----------------------------------------------------------|------------------------------------------|---------|---------|
| ppm   | $\Delta H^\circ$ (kJ mol <sup>-1</sup> ) | $\Delta S^\circ$ (kJ mol <sup>-1</sup> K <sup>-1</sup> ) | $\Delta G^\circ$ (kJ mol <sup>-1</sup> ) |         |         |
|       |                                          |                                                          | 298K                                     | 308K    | 318K    |
| 50    | - 18.66                                  | 0.077                                                    | - 4.28                                   | - 5.05  | - 5.82  |
| 60    | - 19.49                                  | 0.086                                                    | - 6.13                                   | - 6.99  | - 7.58  |
| 70    | - 20.32                                  | 0.094                                                    | - 7.69                                   | - 8.32  | - 9.52  |
| 80    | - 21.20                                  | 0.102                                                    | - 9.11                                   | - 10.13 | - 11.15 |
| 90    | - 22.11                                  | 0.108                                                    | - 10.07                                  | - 11.15 | - 12.23 |

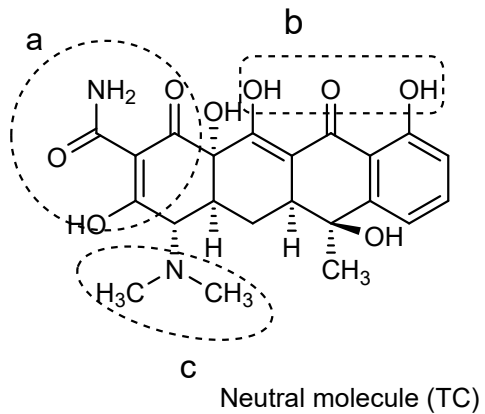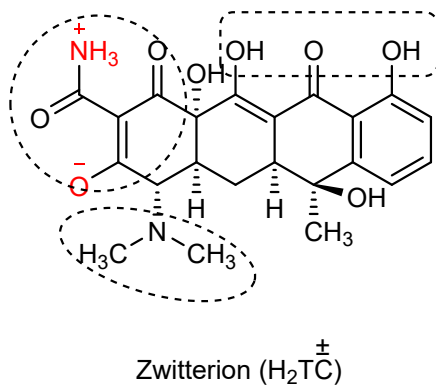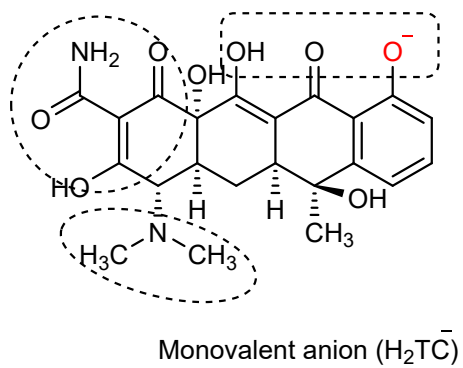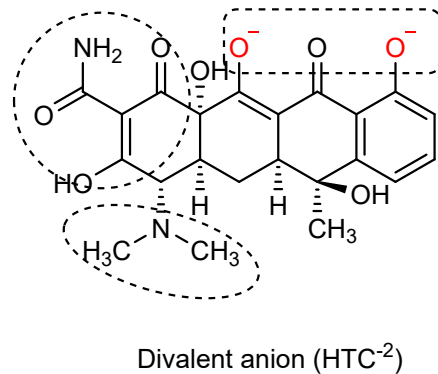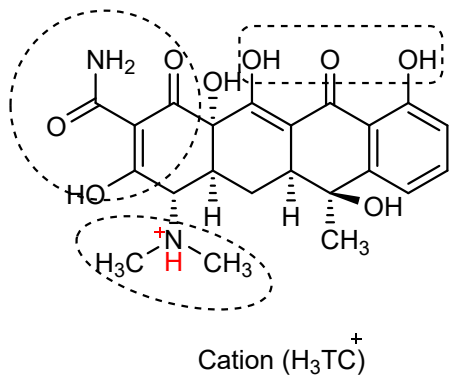

**Figure ESI-1.** Molecular structures of tetracycline showing unique speciation pattern at different pH (pH range of 2 – 12).

## **ESI-1. Adsorption Studies**

### **Influence of dissolved organic matter (DOM) on TC adsorption**

Dissolved organic matter (DOM), a significant component of wastewater, is a complex heterogeneous mixture of organic compounds including humic acid, tryptophan and protein-like organic matter etc., which may limit the adsorption of pharmaceuticals by blocking the pores on the adsorbent (ZnO-Py-Th) surface or by direct competition for the adsorption sites[10]. Additionally, research has demonstrated that many antibiotics, including tetracycline (TCs) antibiotics, can form ternary complexes with DOM through functional groups (such as aldehyde group, carbonyl group, and hydrogen bond), which can impact the adsorption of antibiotics[11]. Complexation of tetracycline with dissolved organic matter (DOM) in aqueous solution could alter the adsorption of tetracycline to adsorbent material (ZnO-Py-Th), thereby declining the adsorption capacity of TC over the adsorbent[12,13]. The magnitude of the inhibition is related to the amount of DOM adsorbed and tetracycline affinity for the DOM. As a result, the influence of DOM with various molecular weights on the adsorption of antibiotics is also very significant. In order to evaluate the impact of DOM on the adsorption of TC onto the adsorbent ZnO-Py-Th, fulvic acid (FA) was selected as a typical DOM and 1 mg/L antibiotics was chosen. Interestingly, it was observed that the introduction of FA (2 -10 mg/L) did not significantly change the adsorption of TC.

## **References**

- [1] A.K. Mishra, V.K. Shahi, N.R. Agrawal, I. Das, Synthesis, Characterization, and



- Application of a Thiophene-Pyrrole Copolymer As an Efficient Adsorbent for Removal of Methylene Blue, *J. Chem. Eng. Data.* 63 (2018) 3206–3214.  
[https://doi.org/10.1021/ACS.JCED.7B00973/SUPPL\\_FILE/JE7B00973\\_SI\\_001.PDF](https://doi.org/10.1021/ACS.JCED.7B00973/SUPPL_FILE/JE7B00973_SI_001.PDF).
- [2] W. Xiong, G. Zeng, Z. Yang, Y. Zhou, C. Zhang, M. Cheng, Y. Liu, L. Hu, J. Wan, C. Zhou, R. Xu, X. Li, Adsorption of tetracycline antibiotics from aqueous solutions on nanocomposite multi-walled carbon nanotube functionalized MIL-53(Fe) as new adsorbent, *Sci. Total Environ.* 627 (2018) 235–244.  
<https://doi.org/10.1016/j.scitotenv.2018.01.249>.
- [3] O. Yaqubi, M.H. Tai, D. Mitra, C. Gerente, K.G. Neoh, C.H. Wang, Y. Andres, Adsorptive removal of tetracycline and amoxicillin from aqueous solution by leached carbon black waste and chitosan-carbon composite beads, *J. Environ. Chem. Eng.* 9 (2021) 104988. <https://doi.org/10.1016/J.JECE.2020.104988>.
- [4] S. Bazgir, S. Farhadi, Y. Mansourpanah, Adsorptive removal of tetracycline and ciprofloxacin antibiotics from water using magnetic MIL101-Fe metal–organic framework/NiFe<sub>2</sub>O<sub>4</sub> decorated with Preyssler-Pope-Jeannin [NaP<sub>5</sub>W<sub>30</sub>O<sub>110</sub>]<sub>14</sub>–polyanion, *J. Solid State Chem.* 315 (2022) 123513.  
<https://doi.org/10.1016/J.JSSC.2022.123513>.
- [5] K. Valizadeh, A. Bateni, N. Sojoodi, R. Rafiei, A.H. Behroozi, A. Maleki, Preparation and characterization of chitosan-curdlan composite magnetized by zinc ferrite for efficient adsorption of tetracycline antibiotics in water, *Int. J. Biol. Macromol.* 235 (2023) 123826.  
<https://doi.org/10.1016/J.IJBIOMAC.2023.123826>.
- [6] S. Erdem, M. Öztekin, Y. Sağ Açıkel, Investigation of tetracycline removal from aqueous

- solutions using halloysite/chitosan nanocomposites and halloysite nanotubes/alginate hydrogel beads, *Environ. Nanotechnology, Monit. Manag.* 16 (2021).  
<https://doi.org/10.1016/j.enmm.2021.100576>.
- [7] V. Varadharajan, D.S. Senthilkumar, K. Senthilkumar, V.P. Sundramurthy, R. Manikandan, H. Senthilarasan, H. Ganesan, I. Kesavamoorthy, A. Ramasamy, Process modeling and toxicological evaluation of adsorption of tetracycline onto the magnetized cotton dust biochar, *J. Water Process Eng.* 49 (2022) 103046.  
<https://doi.org/10.1016/J.JWPE.2022.103046>.
- [8] Q. Hu, Z. Zhang, Application of Dubinin–Radushkevich isotherm model at the solid/solution interface: A theoretical analysis, *J. Mol. Liq.* 277 (2019) 646–648.  
<https://doi.org/10.1016/J.MOLLIQ.2019.01.005>.
- [9] S.U.R. Beig, U.A. Dar, S.A. Sheergugri, S.A. Shah, Remediation of hexavalent chromium and pharmaceuticals from aquatic environments by employing an oxygen-doped porous carbon adsorbent and its antifungal activity, *New J. Chem.* 47 (2023) 8693–8713.  
<https://doi.org/10.1039/D2NJ05841C>.
- [10] W.X. Jia, W.Q. Li, Z.H. Xie, P.C. Guo, Z.L. Ye, Z.K. Xiong, C.S. He, B. Lai, Adsorption behavior of antibiotics with different structures onto vivianite in the presence of dissolved organic matter during the phosphorus recovery process, *Chem. Eng. J.* 470 (2023) 144136.  
<https://doi.org/10.1016/J.CEJ.2023.144136>.
- [11] M. Wang, Y. Chen, Generation and characterization of DOM in wastewater treatment processes, (2018). <https://doi.org/10.1016/j.chemosphere.2018.02.124>.
- [12] X. Cui, D. Zhou, W. Fan, M. Huo, J.C. Crittenden, Z. Yu, P. Ju, Y. Wang, ( W Fan, The

effectiveness of coagulation for water reclamation from a wastewater treatment plant that has a long hydraulic and sludge retention times: A case study, (2016).

<https://doi.org/10.1016/j.chemosphere.2016.05.009>.

- [13] Y. Zhao, J. Geng, X. Wang, X. Gu, S. Gao, Adsorption of tetracycline onto goethite in the presence of metal cations and humic substances, (2011).

<https://doi.org/10.1016/j.jcis.2011.05.051>.
